# Supplementary material for: Metformin in Patients With COVID-19: A Systematic Review and Meta-Analysis
Source: PubMed Central journal article supplement (PMC8416892; doi:10.3389/fmed.2021.704666), 2021-08-19
Supplement: Data_Sheet_1.pdf [file Data_Sheet_1.pdf]

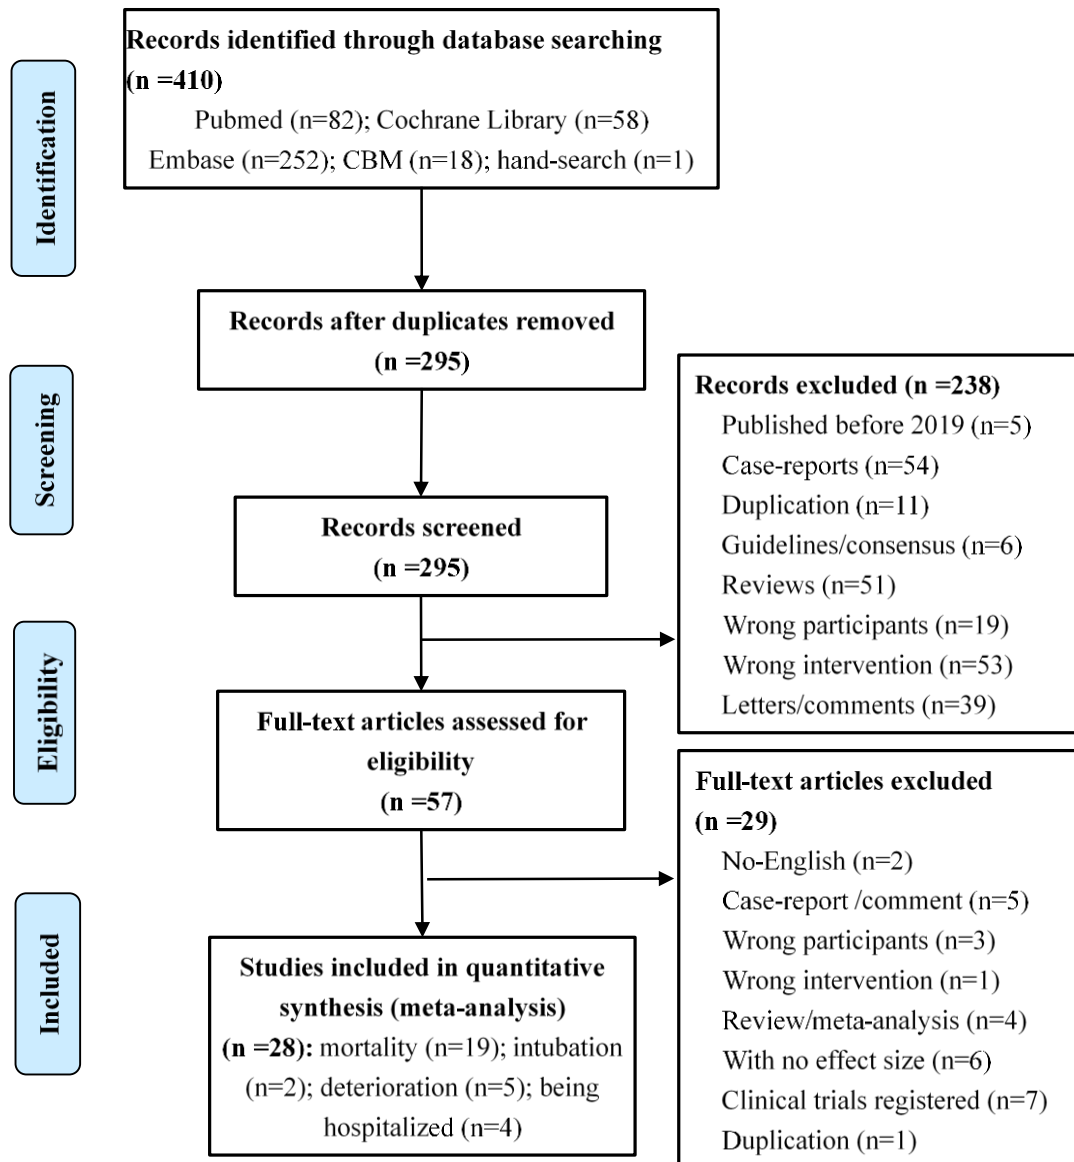

Supplementary Figure 1 Flowchart of study selection for the meta-analysis.

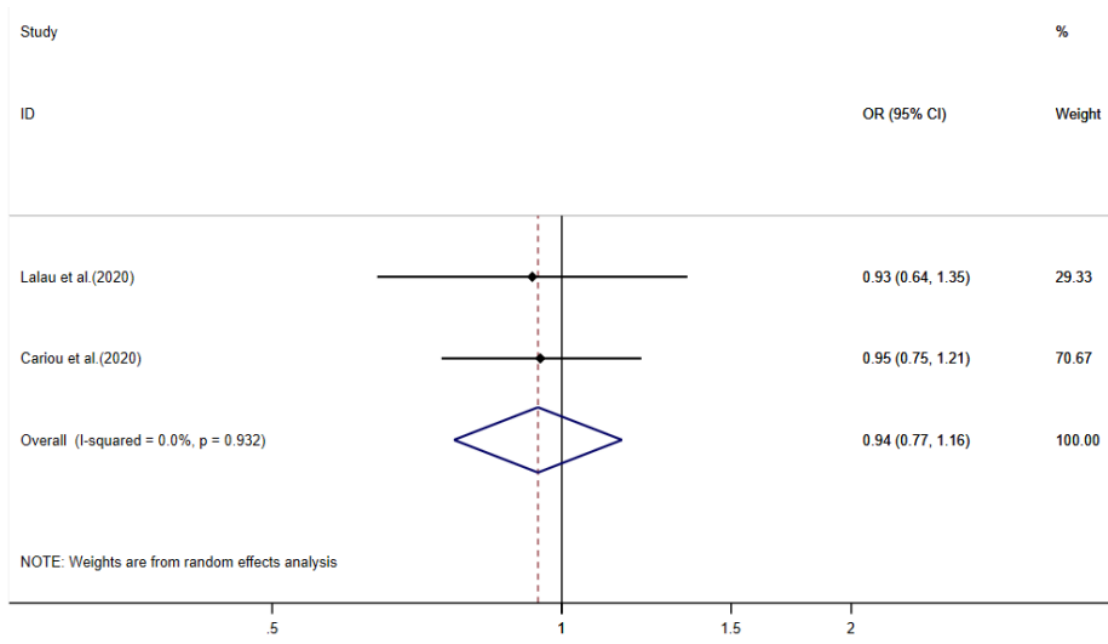

Supplementary Figure 2 Forest plot of studies assessing association between metformin use and intubation among COVID-19 patients. CI, confidence interval; OR, odds ratio.

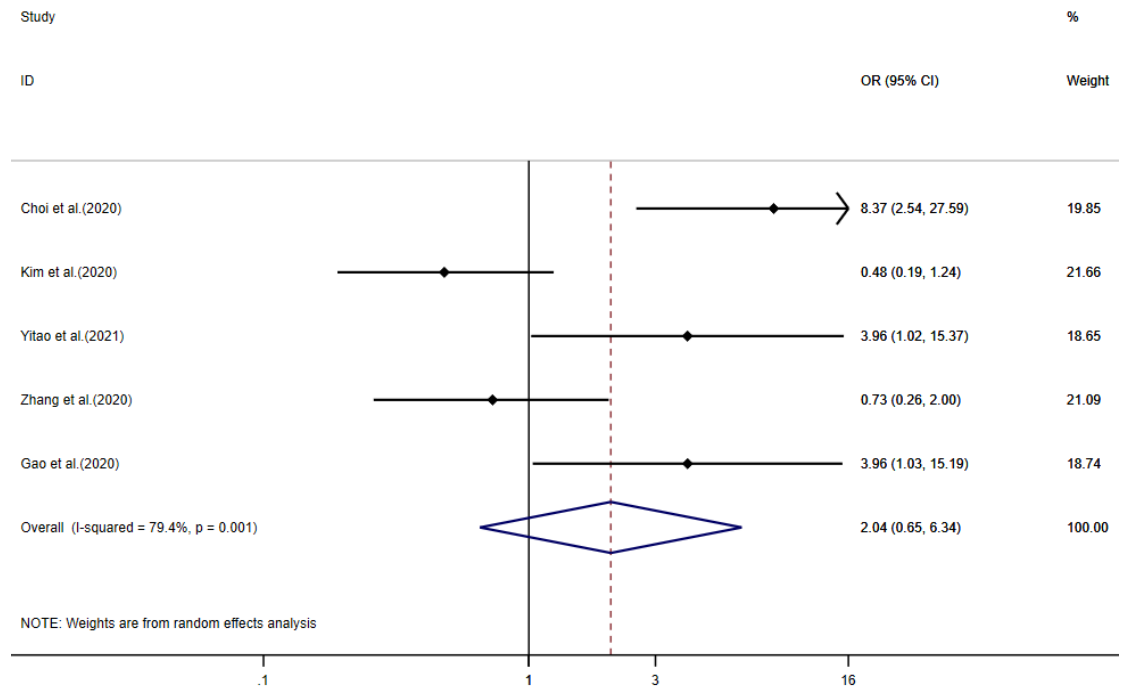

Supplementary Figure 3 Forest plot of studies assessing association between metformin use and deterioration among COVID-19 patients. CI, confidence interval; OR, odds ratio.

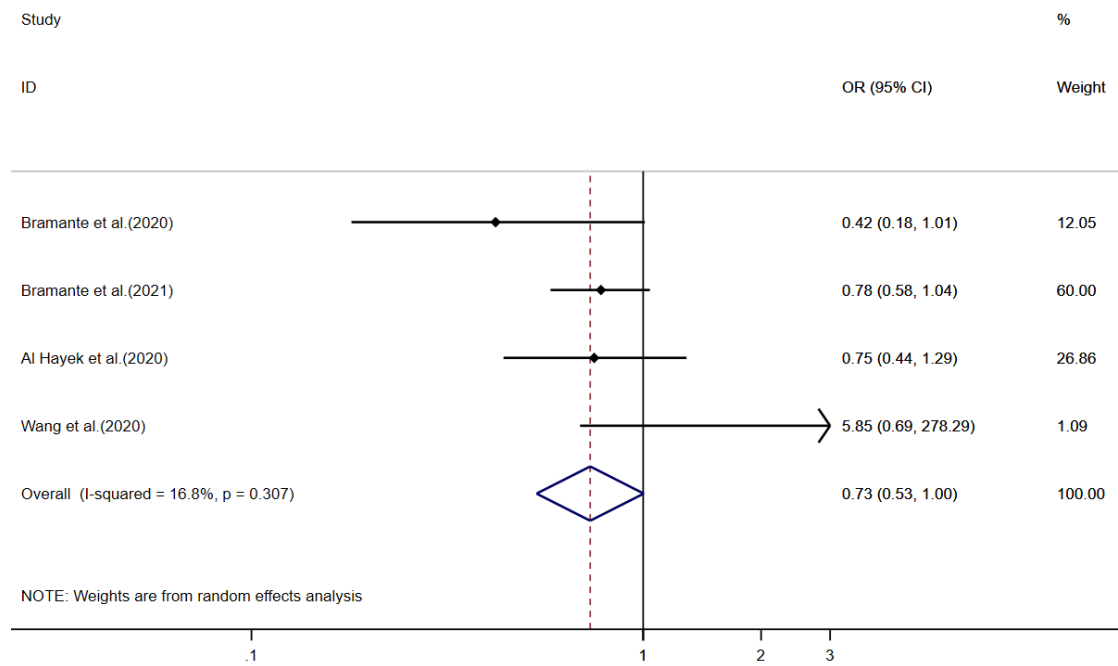

Supplementary Figure 4 Forest plot of studies assessing association between metformin use and being hospitalized among COVID-19 patients. CI, confidence interval; OR, odds ratio.

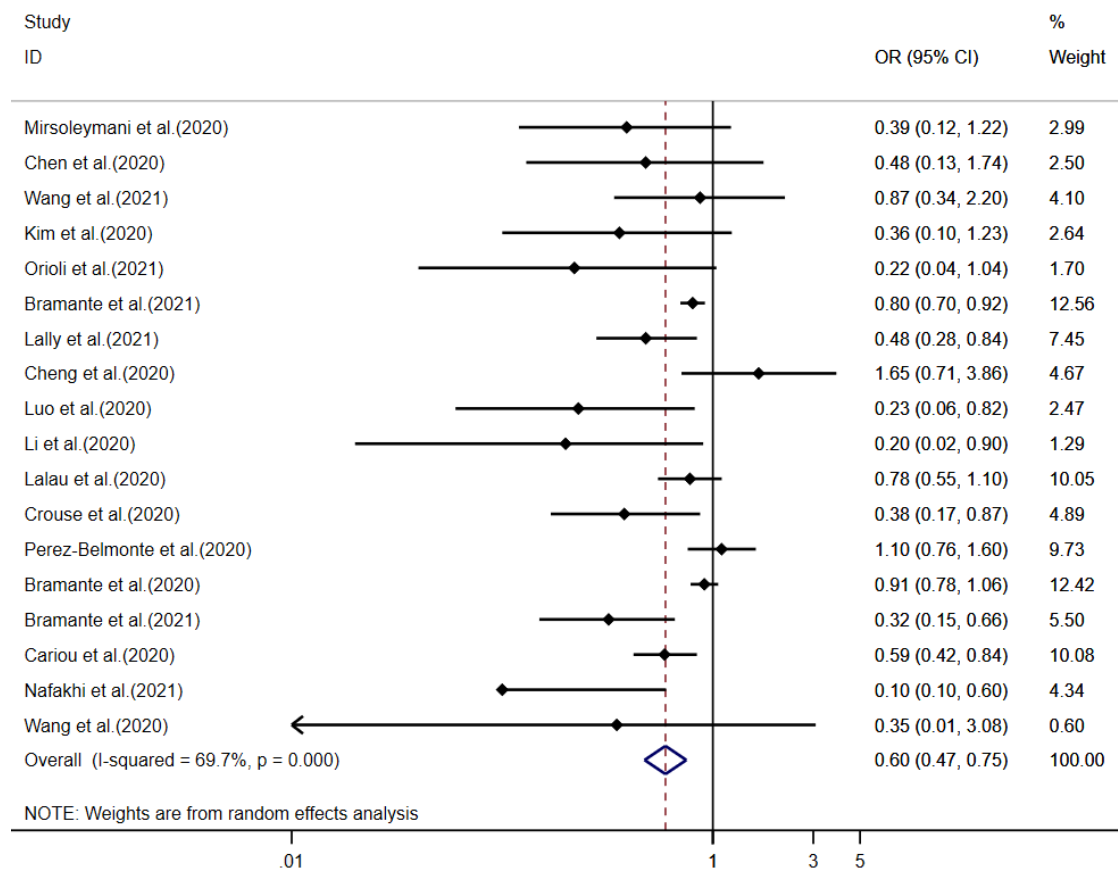

Supplementary Figure 5 Sensitivity analysis of association between metformin use and risk of COVID-19 mortality after excluded the study with the largest number of sample size. CI, confidence interval; OR, odds ratio.

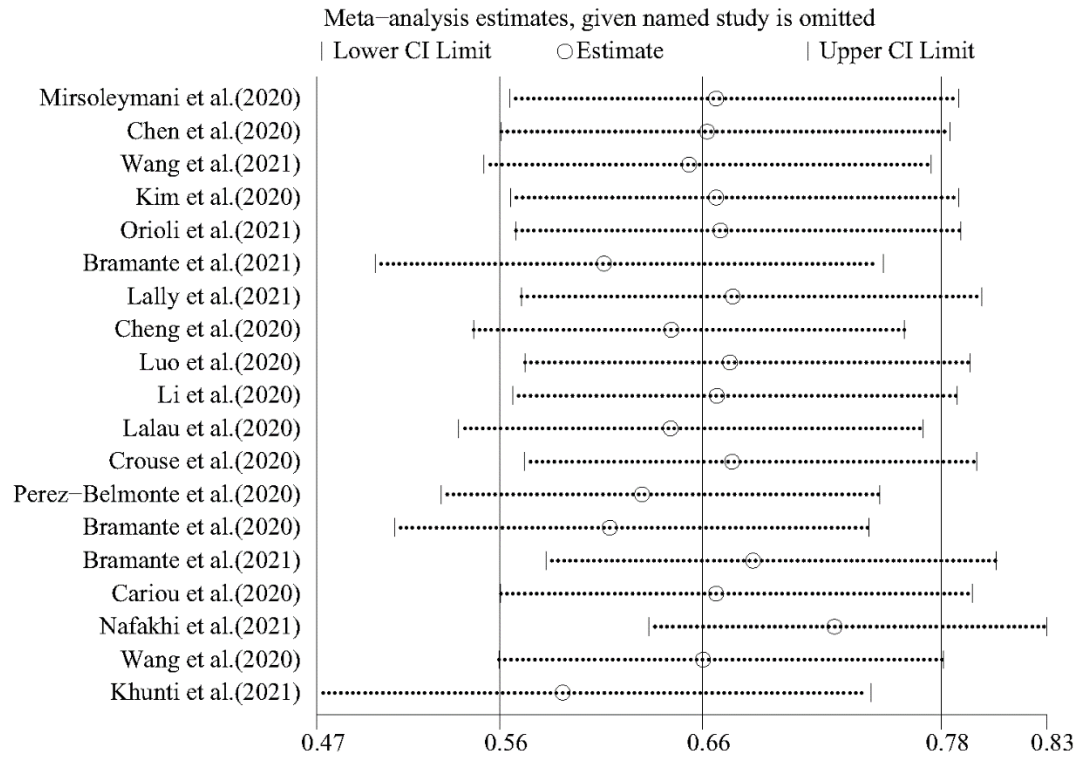

Supplementary Figure 6 Influencing analysis of association between metformin use and risk of COVID-19 mortality. CI, confidence interval; OR, odds ratio.

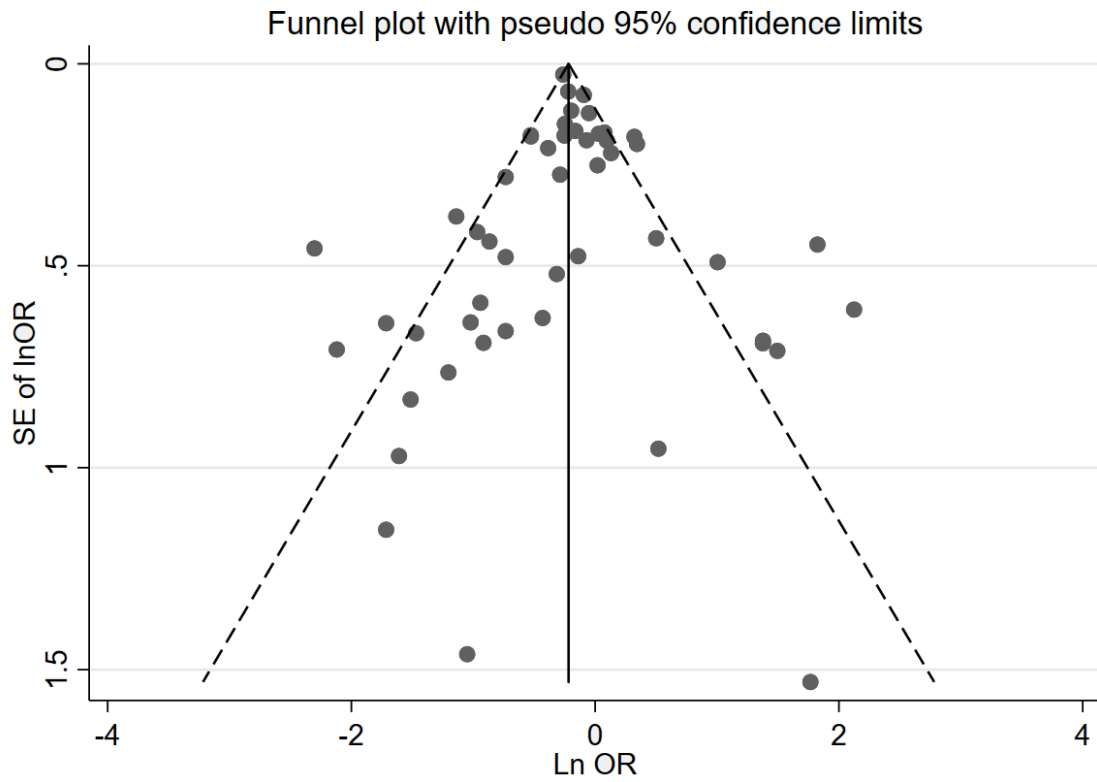

Supplementary Figure 7 Funnel plot for the studies assessing the association between metformin use and mortality among COVID-19 patients. *P* value for Egger's test = 0.879; *P* value for Begg's test = 0.270. Abbreviation: OR, odds ratio; SE, standard error.

Supplementary Table 1 Search strategy in PubMed

---

- #1 ((COVID-19 [Mesh]) OR (SARS-Cov-2 [Mesh]) OR (coronavirus [Mesh]) OR (NCov-2019))
- #2 ((COVID-19 [Title/Abstract]) OR (SARS-Cov-2 [Title/Abstract]) OR (coronavirus [Title/Abstract]) OR (NCov-2019 [Title/Abstract]) OR (2019-nCoV [Title/Abstract]) OR (2019 nCoV [Title/Abstract]) OR (Coronavirus Disease-19 [Title/Abstract]) OR (Coronavirus Disease 19 [Title/Abstract]) OR (Coronavirus Disease 2019 [Title/Abstract]) OR (SARS CoV 2 [Title/Abstract]) OR(2019 Novel Coronavirus [Title/Abstract]) OR (SARS Coronavirus 2 [Title/Abstract]) OR (Severe Acute Respiratory Syndrome Coronavirus 2 [Title/Abstract]))
- #3 #1 OR #2
- #4 (Metformin [Mesh])
- #5 ((Metformin [Title/Abstract]) OR (Dimethylbiguanidine [Title/Abstract]) OR (Dimethylguanylguanidine [Title/Abstract]) OR (Glucophage [Title/Abstract]) OR (Metformin HCl [Title/Abstract]))
- #6 #4 OR #5
- #7 #3 AND #6
-



Supplementary Table 2 Medication, outcomes, and adjusted confounders of included studies

| Author               | Year | Medication                                                                                                                                                                                                                                                                          |                                                                                                                                                                                             |           |                 | Outcomes                                                                                              | Adjusted potential confounders                                                                                                                                                                                                                                                                                                                                                                                                                                                                                                                                                                                                           |
|----------------------|------|-------------------------------------------------------------------------------------------------------------------------------------------------------------------------------------------------------------------------------------------------------------------------------------|---------------------------------------------------------------------------------------------------------------------------------------------------------------------------------------------|-----------|-----------------|-------------------------------------------------------------------------------------------------------|------------------------------------------------------------------------------------------------------------------------------------------------------------------------------------------------------------------------------------------------------------------------------------------------------------------------------------------------------------------------------------------------------------------------------------------------------------------------------------------------------------------------------------------------------------------------------------------------------------------------------------------|
|                      |      | Metformin group                                                                                                                                                                                                                                                                     | Control group                                                                                                                                                                               | Dose      | Type            | Definition                                                                                            |                                                                                                                                                                                                                                                                                                                                                                                                                                                                                                                                                                                                                                          |
| Izzi-Engbeaya et al. | 2021 | NA                                                                                                                                                                                                                                                                                  | NA                                                                                                                                                                                          | NA        | Mortality/ICU   | NA                                                                                                    | None                                                                                                                                                                                                                                                                                                                                                                                                                                                                                                                                                                                                                                     |
| Mirsoleymani et al.. | 2020 | NA                                                                                                                                                                                                                                                                                  | NA                                                                                                                                                                                          | NA        | Mortality       | NA                                                                                                    | None                                                                                                                                                                                                                                                                                                                                                                                                                                                                                                                                                                                                                                     |
| Liu et al.           | 2020 | NA                                                                                                                                                                                                                                                                                  | NA                                                                                                                                                                                          | NA        | Mortality/ICU   | NA                                                                                                    | HbA1c at admission                                                                                                                                                                                                                                                                                                                                                                                                                                                                                                                                                                                                                       |
| Jiang et al.         | 2020 | NA                                                                                                                                                                                                                                                                                  | NA                                                                                                                                                                                          | ≥500 mg/d | Mortality; ARDS | NA                                                                                                    | Age, gender, weight, FBG, severity of COVID-19, Charlson comorbidity index, glucocorticoids, DDI, LDH, CRP, duration of diabetes, metformin therapy prior to hospitalization.                                                                                                                                                                                                                                                                                                                                                                                                                                                            |
| Wang et al.          | 2021 | Patients should be on a current metformin prescription (extending into the pandemic period) and co-prescribed at least one of eight other glucose-lowering agents. Patients who were on metformin monotherapy were excluded as they will be at an early disease status resulting in | Patients should not be a current or recent user of metformin and should have a prescription for at least one of the eight other glucose-lowering agents extending into the pandemic period. | NA        | Mortality       | Defined as individuals who died within 28 days after the diagnosis of suspected or confirmed COVID-19 | Age, sex, smoking status, high alcohol consumption (alcoholism), body mass index categories, total cholesterol categories, high-density lipoprotein categories, Albumin-creatinine ratio categories, estimated glomerular filtration rate categories, HbA1c categories, atrial fibrillation, rheumatoid arthritis, hypertension, cardiovascular disease, non-alcoholic fatty liver disease or non-alcoholic steatohepatitis, prescriptions of renin angiotensin aldosterone system inhibitors, other antihypertensive drugs, lipid lowering drugs, antiplatelets, anticoagulants, diabetes complications, diabetes duration, respiratory |

---

|               |      |    |                     |    |                                                                    |                                                                                                                                                                                                                                                                                                                                           |                                                                                                                                                                                                                                                            |                                                                                 |
|---------------|------|----|---------------------|----|--------------------------------------------------------------------|-------------------------------------------------------------------------------------------------------------------------------------------------------------------------------------------------------------------------------------------------------------------------------------------------------------------------------------------|------------------------------------------------------------------------------------------------------------------------------------------------------------------------------------------------------------------------------------------------------------|---------------------------------------------------------------------------------|
|               |      |    | immortal time bias. |    |                                                                    |                                                                                                                                                                                                                                                                                                                                           |                                                                                                                                                                                                                                                            | disease, cancers, immunosuppressant therapies, and systemic corticosteroid use. |
| Choi et al.   | 2020 | NA | NA                  | NA | Progression; improvement /stabilization; progression-free survival | The progression group comprised mild or moderate cases that progressed to moderate or severe cases; The improvement/stabilization group comprised mild cases that did not progress further; Progression-free survival was defined as the duration of time over which patients with COVID-19 remained stable during their hospitalization. | Age, healthcare-associated infection, ECOG performance status, asymptomatic on initial evaluation, BT at hospital admission, diastolic BP at hospital admission, PR at hospital admission, SpO2 at hospital admission, hypertension, and diabetes mellitus |                                                                                 |
| Kim et al.    | 2020 | NA | NA                  | NA | Mortality; progression                                             | The necessity for the use of a high-flow nasal cannula, mechanical ventilation, CRRT, or ECMO, or admission to an ICU                                                                                                                                                                                                                     | None                                                                                                                                                                                                                                                       |                                                                                 |
| Orioli et al. | 2021 | NA | NA                  | NA | Mortality                                                          | NA                                                                                                                                                                                                                                                                                                                                        | None                                                                                                                                                                                                                                                       |                                                                                 |
| Do et al.     | 2020 | NA | NA                  | NA | Survival                                                           | NA                                                                                                                                                                                                                                                                                                                                        | Age, gender, Charlson Comorbidity Index score,                                                                                                                                                                                                             |                                                                                 |

---

---

|                 |      |    |    |                                                        |                                                                                                         |                                                |  |                                                                                                                                                                                                    |
|-----------------|------|----|----|--------------------------------------------------------|---------------------------------------------------------------------------------------------------------|------------------------------------------------|--|----------------------------------------------------------------------------------------------------------------------------------------------------------------------------------------------------|
|                 |      |    |    |                                                        |                                                                                                         |                                                |  | hypertension and group according to metformin use                                                                                                                                                  |
| Bramante et al. | 2021 | NA | NA | > 90 days during the year before admission to hospital | Mortality                                                                                               | NA                                             |  | None                                                                                                                                                                                               |
| Lally et al.    | 2021 | NA | NA | NA                                                     | Mortality                                                                                               | NA                                             |  | Age, body mass index, hemoglobin A1c, estimated glomerular filtration rate, long stay (>90 days), and underlying psychoses.                                                                        |
| Cheng et al.    | 2020 | NA | NA | NA                                                     | Mortality; acidosis; lactic acidosis; ARDS; DIC; heart failure; acute kidney injury; acute heart injury | NA                                             |  | Age, gender, comorbidities (cerebrovascular disease and coronary heart disease), blood glucose, C-reactive protein, estimated glomerular filtration rate, alanine aminotransferase, and creatinine |
| Luo et al.      | 2020 | NA | NA | ≥3 days                                                | Mortality                                                                                               | NA                                             |  | None                                                                                                                                                                                               |
| Li et al.       | 2020 | NA | NA | NA                                                     | Mortality                                                                                               | NA                                             |  | None                                                                                                                                                                                               |
| Lalau et al.    | 2020 | NA | NA | NA                                                     | Mortality; IMV and Mortality in 8 days; IMV in 28 days                                                  | Tracheal intubation for mechanical ventilation |  | None                                                                                                                                                                                               |
| Crouse et al.   | 2020 | NA | NA | NA                                                     | Mortality                                                                                               | NA                                             |  | Age, race, sex, obesity, hypertension, diabetes, insulin in T2DM                                                                                                                                   |

---

|                       |      |                                                                                                               |                              |    |                                                                      |                                    |                                                                                                                                                                                                                                                                                                                                                                                                                                                                                                                                                                                                                                                       |
|-----------------------|------|---------------------------------------------------------------------------------------------------------------|------------------------------|----|----------------------------------------------------------------------|------------------------------------|-------------------------------------------------------------------------------------------------------------------------------------------------------------------------------------------------------------------------------------------------------------------------------------------------------------------------------------------------------------------------------------------------------------------------------------------------------------------------------------------------------------------------------------------------------------------------------------------------------------------------------------------------------|
| Perez-Belmonte et al. | 2020 | monotherapy                                                                                                   | other glucose-lowering drugs | NA | Mortality; Mortality/ICU/IMV; complications; long-time hospital stay | NA                                 | None                                                                                                                                                                                                                                                                                                                                                                                                                                                                                                                                                                                                                                                  |
| Bramante et al.       | 2020 | NA                                                                                                            | NA                           | NA | Hospitalized                                                         | The hospital disposition indicator | None                                                                                                                                                                                                                                                                                                                                                                                                                                                                                                                                                                                                                                                  |
| Bramante et al.       | 2020 | NA                                                                                                            | NA                           | NA | Mortality                                                            | NA                                 | Age, sex, pre-existing conditions, BMI, medications                                                                                                                                                                                                                                                                                                                                                                                                                                                                                                                                                                                                   |
| Bramante et al.       | 2021 | documented in the home medication list in the EHR within the 3 months before the positive SARS-CoV-2 PCR test | NA                           | NA | Mortality; hospitalized; ICU;                                        | NA                                 | Age, race/ethnicity, gender, English-speaking status, T2DM, BMI category, history of bariatric surgery, <sup>4</sup> NAFLD/non-alcoholic steatohepatitis (NASH), <sup>4</sup> coronary artery disease, heart failure, CKD; hypertension, hyper- or hypo-coagulable state, interstitial lung disease, tobacco use; and home medications: steroids; insulin, glucagon-like-peptide-1 receptor agonists <sup>4</sup> , sulfonylureas, sodium-glucose transport protein 2 inhibitors, dipeptidyl peptidase-4 inhibitors, statins, anti-dementia medications, <sup>25</sup> and angiotensin-converting enzyme inhibitors and angiotensin receptor blockers |
| Cariou et al.         | 2020 | NA                                                                                                            | NA                           | NA | Mortality; IMV in 7 days                                             | Death within 7 days of admission   | None                                                                                                                                                                                                                                                                                                                                                                                                                                                                                                                                                                                                                                                  |
| Nafakhi et al.        | 2021 | NA                                                                                                            | NA                           | NA | Mortality; length of ICU stays; length of hospital stays             | NA                                 | Baseline comorbidities, blood indices, and ECG markers on admission                                                                                                                                                                                                                                                                                                                                                                                                                                                                                                                                                                                   |

|                 |      |    |    |    |              |                                                                                                                                                                                                                                                                                                                                                                   |      |
|-----------------|------|----|----|----|--------------|-------------------------------------------------------------------------------------------------------------------------------------------------------------------------------------------------------------------------------------------------------------------------------------------------------------------------------------------------------------------|------|
| Yitao et al.    | 2021 | NA | NA | NA | Progression  | When one or more of the following conditions occurred: 1) shortness of breath, with respiratory rates (RR) 30 times/ min; 2) arterial oxygen saturation (resting status) 93%; or 3) ratio of partial pressure of oxygen to fraction of inspiration O2 (PaO2/FiO2) 300 mmHg.                                                                                       | None |
| Al Hayek et al. | 2020 | NA | NA | NA | Hospitalized | Hospital admission severity criteria: i) Mild to moderate: patients who exhibited distinct upper respiratory and constitutional symptoms or patients who revealed early clinical or radiological pneumonia. ii) Severe: patients with $\geq 1$ of the listed symptoms, respiratory rate $\geq 30$ /min, blood oxygen saturation $\leq 93\%$ , partial pressure of | None |

---

|              |      |    |    |    |                         |                                                                                                                                                                                                                                                                                               |                                         |
|--------------|------|----|----|----|-------------------------|-----------------------------------------------------------------------------------------------------------------------------------------------------------------------------------------------------------------------------------------------------------------------------------------------|-----------------------------------------|
|              |      |    |    |    |                         | oxygen/fraction of inspired oxygen ratio <300 or lung infiltrates >50% of the lung field from between 24-48 hours, and iii) Critical: patients who revealed $\geq 1$ of the following symptoms such as ARDS, sepsis, altered consciousness, multi-organ failure or cytokine release syndrome. |                                         |
| Zhang et al. | 2020 | NA | NA | NA | Progression             | Acute respiratory distress syndrome, sepsis and septic shock, and those organ dysfunctions requiring admission to the ICU                                                                                                                                                                     | None                                    |
| Gao et al.   | 2020 | NA | NA | NA | Progression             | Acute respiratory distress syndrome, sepsis and septic shock, and those organ dysfunctions requiring admission to the ICU                                                                                                                                                                     | Age, sex, blood glucose, and LDH levels |
| Wang et al.  | 2020 | NA | NA | NA | Mortality; hospitalized | NA                                                                                                                                                                                                                                                                                            | None                                    |

---

---

|               |      |                            |                               |    |                            |                                                                                                                                                         |                  |
|---------------|------|----------------------------|-------------------------------|----|----------------------------|---------------------------------------------------------------------------------------------------------------------------------------------------------|------------------|
| Khunti et al. | 2021 | Prescription for metformin | No prescription for metformin | NA | COVID-19 related mortality | Deaths were defined as COVID-19 related if the ICD-10 codes U07.1 (COVID-19, virus identified) or U07.2 (COVID-19, virus not identified) were recorded. | Propensity score |
|---------------|------|----------------------------|-------------------------------|----|----------------------------|---------------------------------------------------------------------------------------------------------------------------------------------------------|------------------|

---

ARDS, acute respiratory distress syndrome; IMV, intubation for mechanical ventilation; T2DM, Type 2 diabetes; NAFLD, non-alcoholic fatty liver disease; NA, not available.

Supplementary Table 3 Quality assessment of included studies by Newcastle-Ottawa Scale.

| First author (year)         | Representativeness | Selection of non-exposed | Ascertainment of exposure | Outcome not present at start | Control for primary confounders | Control for secondary confounders | Assessment of outcome | Duration of follow-up | Adequacy of follow-up | Total |
|-----------------------------|--------------------|--------------------------|---------------------------|------------------------------|---------------------------------|-----------------------------------|-----------------------|-----------------------|-----------------------|-------|
| Izzi-Engbeaya et al. (2021) | 1                  | 1                        | 1                         | 0                            | 0                               | 0                                 | 0                     | 1                     | 1                     | 5     |
| Mirsoleymani et al. (2020)  | 1                  | 1                        | 1                         | 0                            | 0                               | 0                                 | 1                     | 1                     | 1                     | 6     |
| Liu et al. (2020)           | 1                  | 1                        | 1                         | 0                            | 0                               | 1                                 | 1                     | 1                     | 1                     | 7     |
| Jiang et al. (2020)         | 1                  | 1                        | 1                         | 0                            | 1                               | 1                                 | 1                     | 1                     | 1                     | 8     |
| Wang et al. (2021)          | 1                  | 1                        | 1                         | 0                            | 1                               | 1                                 | 1                     | 1                     | 1                     | 9     |
| Choi et al. (2020)          | 1                  | 1                        | 0                         | 1                            | 1                               | 1                                 | 1                     | 1                     | 0                     | 7     |
| Kim et al. (2020)           | 1                  | 1                        | 1                         | 0                            | 1                               | 1                                 | 1                     | 1                     | 1                     | 8     |
| Orioli et al. (2021)        | 1                  | 1                        | 1                         | 0                            | 0                               | 0                                 | 1                     | 1                     | 1                     | 6     |
| Do et al. (2020)            | 1                  | 1                        | 1                         | 0                            | 1                               | 1                                 | 1                     | 1                     | 1                     | 8     |
| Bramante et al. (2021)      | 1                  | 1                        | 1                         | 0                            | 0                               | 0                                 | 1                     | 1                     | 1                     | 6     |
| Lally et al. (2021)         | 1                  | 1                        | 1                         | 0                            | 1                               | 1                                 | 1                     | 1                     | 1                     | 8     |
| Cheng et al. (2020)         | 1                  | 1                        | 1                         | 0                            | 1                               | 1                                 | 1                     | 1                     | 1                     | 8     |
| Luo et al. (2020)           | 1                  | 1                        | 1                         | 0                            | 0                               | 0                                 | 1                     | 1                     | 1                     | 6     |
| Li et al. (2020)            | 1                  | 1                        | 1                         | 0                            | 0                               | 0                                 | 1                     | 1                     | 1                     | 6     |
| Lalau et al. (2020)         | 1                  | 1                        | 1                         | 0                            | 0                               | 0                                 | 1                     | 1                     | 1                     | 6     |
| Crouse et al. (2020)        | 1                  | 1                        | 1                         | 0                            | 1                               | 0                                 | 1                     | 1                     | 1                     | 7     |
